# Supplementary material
Source: Springer Nature journal article supplement (https://www.springermedizin.de/resource/supplementary/12958_2014_1243_MOESM2_ESM.pdf/9567138)

**A**

males

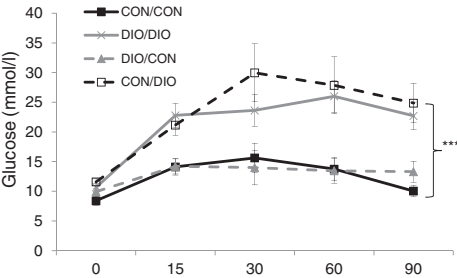**B**

males

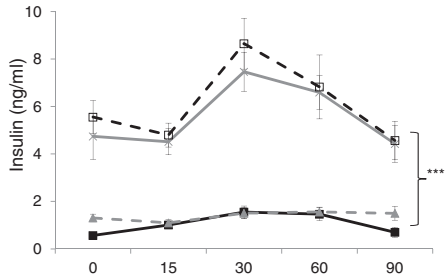**C**

females

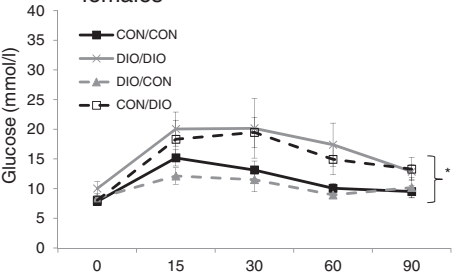**D**

females

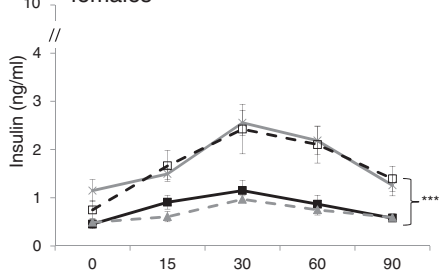

Supplement: MOESM2 [file 9567138]
